# Supplementary material for: Glial cells are functionally impaired in juvenile neuronal ceroid lipofuscinosis and detrimental to neurons
Source: PubMed Central journal article supplement (PMC5645909; doi:10.1186/s40478-017-0476-y), 2017-10-17
Supplement: 40478_2017_476_MOESM5_ESM.pdf [file 40478_2017_476_MOESM5_ESM.pdf]

Supplementary table 1

| Mitogens                       | 6h Untreated        | 24h Untreated        | 72h Untreated        |
|--------------------------------|---------------------|----------------------|----------------------|
| CRP mouse                      | 78.5%±27.3          | 14.2%±8.3            | 31.7%±4.1            |
| M-CSF                          | 18.5%±18.1          | -32.2%±16.1          | -41.5%±0.5 *         |
| EGF                            | 17.1%±6.7           | 26.5%±19.5           | 20.2%±11.8           |
| IL-3                           | -5.3%±16.           | 14.0%±39.0           | 31.1%±29.1           |
| FGF basic                      | -0.3%±24.9          | 0.4%±5.2             | -25.5%±10.1          |
| SCF                            | -20.6%±23.6         | -64.3%±1.2           | -57.3%±1.7           |
| GM-CSF                         | -30.7%±14.2         | -35.4%±2.1           | 27.9%±36.7           |
| FGF-9                          | -21.4%±16.8         | -                    | -31.5%±13.5          |
| TPO                            | -                   | -                    | -                    |
| IL-5                           | -                   | -                    | -                    |
| <b>Pro-inflammatory</b>        | <b>6h Untreated</b> | <b>24h Untreated</b> | <b>72h Untreated</b> |
| IFN γ                          | -13.9%±20.3         | -40.7%±5.4           | -22.8%±5.9           |
| IL-17a                         | -                   | 56.5.5%±0            | -14.6%±13.4          |
| Oncostatin M                   | -11.9%±17.1         | -39.9%±12.2          | -51.8%±0.9           |
| IL-6                           | -57.4%±4.7          | -72.9%±0.5           | -68.6%±1.8           |
| IL-12p70                       | -                   | -49.4%±7.9           | -                    |
| IL-1 α                         | -29.6%±11.8         | -48.6%±1.9           | -45.3%±2.6           |
| IL-18                          | 152.9%±204.7        | 64.6%±69.0           | -                    |
| TNF α                          | 19.6%±16.8          | -51.5%±5.0           | -47.6%±6.3           |
| CD40 ligand                    | -                   | -                    | -                    |
| IL-1 β                         | 31.9%±33.9          | -74.9%±25.1          | 0.7%±57.7            |
| <b>Vascular/haematological</b> | <b>6h Untreated</b> | <b>24h Untreated</b> | <b>72h Untreated</b> |
| Tissue Factor                  | 168.5%±76.4         | 237.6%±56.7          | 97.3%±84.5 *         |
| Haptoglobin                    | 3.2%±6.0            | -15.3%±4.9           | 10.1%±14.8           |
| VEGF                           | 3.9%±26.7           | 1.2%±23.0            | -0.3%±2.5            |
| Endothelin                     | 17.9%±25.0          | 4.8%±25.6            | 10.6%±72.2           |
| Factor VII                     | 4.9%±5.5            | -8.2%±14.2           | -8.9%±5.6            |
| Fibrinogen                     | 10.8%±7.4           | 7.6%±8.0             | 6.2%±1.0             |
| MPO                            | -                   | -                    | -                    |
| SAP                            | -                   | -                    | -                    |
| vWF                            | -                   | -                    | -                    |
| <b>Chemokines</b>              | <b>6h Untreated</b> | <b>24h Untreated</b> | <b>72h Untreated</b> |
| Eotaxin                        | 39.2%±47.1          | -44.7%±0             | -55.9%±15.2          |
| MIP-1 α                        | 10.1%±2.8           | -6.8%±11.8           | -44.1%±3.6           |
| MCP-3                          | -68.1%±5.3          | -74.8%±6.7           | -82.1%±0.5           |
| MCP-1                          | -63.2%±5.8          | -74.1%±7.4           | -81.5%±0.5           |
| KC/GRO α                       | -                   | -                    | -93.7%±0.2           |
| Lymphotactin                   | 8.9%±13.1           | -40.2%±21.0          | -41.9%±0.9           |
| MIP-3 β                        | 21.8%±8.5           | -5.6%±11.2           | -7.4%±5.7            |
| MIP-2                          | -37.0%±6.1          | -35.4%±2.1           | -44.7%±3.2           |
| IP-10                          | -58.8%±6.3          | -77.3%±3.2           | -62.7%±4.9           |
| RANTES                         | -73.4%±5.3          | -71.5%±3.4           | -73.9%±1.7           |
| MDC                            | 45.2±39.4           | -23.8±7.6            | -45.5±7.5            |
| MCP-5                          | -71.2%±2.6          | -79.9%±1.5           | -83.1%±1.5           |
| MIP-1 γ                        | -78.3%±2.9          | -84.5%±2.9           | -83.0%±0.2 ***       |
| GCP-2                          | -                   | -94.8%±1.0           | -95.5%±16.7 ***      |
| MIP-1 β                        | -45.9%±7.5          | -66.4%±3.6           | -80.7%±1.5           |
| <b>Anti-inflammatory</b>       | <b>6h Untreated</b> | <b>24h Untreated</b> | <b>72h Untreated</b> |
| IgG A                          | 68.6%±50.8          | 16.6%±6.8            | 49.3%±16.0           |
| IL-4                           | -                   | -                    | -                    |
| IL-10                          | -                   | -                    | -                    |
| IL-2                           | -                   | -                    | -                    |
| <b>Pleiotropic /others</b>     | <b>6h Untreated</b> | <b>24h Untreated</b> | <b>72h Untreated</b> |
| LIF                            | -30.8%±4.7          | -19.5%±11.7          | -19.1%±3.9           |
| TIMP1                          | 10.1%±15.0          | -62.5%±4.0           | -61.8%±1.7 *         |
| IL-11                          | -48.7%±3.8          | -71.5%±0.1           | -55.5%±1.6           |
| IL-7                           | -                   | -23.9%±3.1           | -34.4%±2.7           |
| VCAM1                          | -54.4%±5.8          | -47.3%±6.2           | -46.0%±3.6           |
| GST-α                          | -                   | -                    | -                    |
| CD40                           | -                   | -                    | -                    |
| MMP 9                          | -                   | -                    | -                    |
| Myoglobin                      | -                   | -                    | -                    |
| Apolipoprotein A-I             | -                   | -                    | -                    |
| SGOT                           | -                   | -                    | -                    |

Supplementary table 2

| Mitogens                       | 6h LPS/IFNY        | 24h LPS/IFNY        | 72h LPS/IFNY        |
|--------------------------------|--------------------|---------------------|---------------------|
| CRP mouse                      | 62.8±44.5          | 82.3±47.9 *         | 11.0±15.6           |
| M-CSF                          | 60.9±3.2           | -14.3±37.7          | -21.1±4.0 *         |
| EGF                            | 35.2±2.8           | 29.1±33.8           | -31.6±6.8 ***       |
| IL-3                           | 29.2±10.8          | -22.6±37.8          | -49.8±3.1***        |
| FGF basic                      | 5.6±13.0           | -30.5±17.6          | -57.8±2.1 ***       |
| SCF                            | -3.4±1.5           | 32.0±49.0           | -4.7±3.5            |
| GM-CSF                         | -3.4±35.6          | -20.3±39.0          | -88.1±1.2 ***       |
| FGF-9                          | -8±11.8            | -29.1±30.6          | -57.3±1.1 ***       |
| TPO                            | -                  | -61.4±11.8 **       | -72.0±4.7 ***       |
| IL-5                           | -                  | -                   | -                   |
| <b>Pro-inflammatory</b>        | <b>6h LPS/IFNY</b> | <b>24h LPS/IFNY</b> | <b>72h LPS/IFNY</b> |
| IFN γ                          | 101.8±67           | 34.2±62.9           | -92.4±0.1 ***       |
| IL-17a                         | 18.8±8.6           | -59.5±17.6 **       | -80.3±0.5 ***       |
| Oncostatin M                   | 16.2±3.1           | 47.5±53.6           | 4.0±3.0             |
| IL-6                           | -6.4±12.4          | -77.8±10.9 ***      | -93.9±0.5 ***       |
| IL-12p70                       | -9.7±4.0           | -44.3±25.8          | -72.3±1.9 ***       |
| IL-1 α                         | -14.9±3.2          | -6.0±40.4           | -70.0±2.2 ***       |
| IL-18                          | -40.6±18.6         | 15.6±74.5           | -90.2±4.9 **        |
| TNF α                          | -43.8±1.9          | -53.3±18.9 **       | -71.4±1.8 ***       |
| CD40 ligand                    | -                  | 28.8±76.4           | 21.0±50.0           |
| IL-1 β                         | -                  | -66.3±18.3          | -53.8±3.5 **        |
| <b>Vascular/haematological</b> | <b>6h LPS/IFNY</b> | <b>24h LPS/IFNY</b> | <b>72h LPS/IFNY</b> |
| Tissue Factor                  | 215.4±79           | -69.1±12.2 **       | -72.6±6.2 ***       |
| Haptoglobin                    | 53.2±23.1          | 143.0±19.4          | 74.3±26.7           |
| VEGF                           | 30±6.4             | -44.8±25.1          | -76.0±1.9 ***       |
| Endothelin                     | 23±19.1            | -43.3±28.4          | -68.2±4.4 ***       |
| Factor VII                     | 8.5±6.8            | 1.8±28.7            | -42.4±3.5 ***       |
| Fibrinogen                     | 5.0±0.6            | 80.1±31.7 ***       | 5.6±5.0             |
| MPO                            | -                  | -                   | -                   |
| SAP                            | -                  | -                   | -                   |
| vWF                            | -                  | -                   | -                   |
| <b>Chemokines</b>              | <b>6h LPS/IFNY</b> | <b>24h LPS/IFNY</b> | <b>72h LPS/IFNY</b> |
| Eotaxin                        | 73.5±48.0          | -71.03±12.3 ***     | -71.7±2.8 ***       |
| MIP-1 α                        | 61.0±3.2           | -81.5±8.0 **        | -70.5±1.1 ***       |
| MCP-3                          | 46.7±54.5          | -26.7±35.1          | -63.9±2.3 ***       |
| MCP-1                          | 46.7±4.8           | -40.9±28.5          | -73.5±1.4 ***       |
| KC/GRO α                       | 29.7±32.8          | -27.5±35.6          | -74.4±3.7 ***       |
| Lymphotactin                   | 28.6±6.0           | 40.4±46.7           | -3.6±4.0            |
| MIP-3 β                        | 19.4±5.7           | -67.2±10.5 ***      | -73.2±0.9 ***       |
| MIP-2                          | 19.3±41.3          | -51.2±23.7 *        | -86.4±2.1 ***       |
| IP-10                          | 15.4±8.4           | -22.8±29.4          | -48.7±5.6 ***       |
| RANTES                         | -9.9±22.6          | -29.8±33.7          | -66.5±3.4 ***       |
| MDC                            | -22.5±12.6         | -90.4±4.2 ***       | -86.4±3.2 ***       |
| MCP-5                          | -27.8±12.6         | -62.5±17.8          | -67.7±0.9 ***       |
| MIP-1 γ                        | -52.4±6.5          | -75.2±11.6 ***      | -55.0±5.7 ***       |
| GCP-2                          | -57.8±16.7         | -87.9±5.8 ***       | -84.4±0.8 ***       |
| MIP-1 β                        | -70.1±2.4          | -88.9±4.8 ***       | -81.7±1.4 ***       |
| <b>Anti-inflammatory</b>       | <b>6h LPS/IFNY</b> | <b>24h LPS/IFNY</b> | <b>72h LPS/IFNY</b> |
| IgG A                          | 123.8±46.4         | 130.2±70.5 **       | 49.7±11.8           |
| IL-4                           | 57.9±32.2          | 1.3±31.1            | -45.0±3.5 ***       |
| IL-10                          | 36.1±14.9          | -48.3±23.6 *        | -75.4±0.9 ***       |
| IL-2                           | 5.2±6.6            | -49.4±23.8 **       | -77.3±0.7 ***       |
| <b>Pleiotropic /others</b>     | <b>6h LPS/IFNY</b> | <b>24h LPS/IFNY</b> | <b>72h LPS/IFNY</b> |
| LIF                            | 40.1±15.0          | -31.8±30.3          | -72.3±1.5 ***       |
| TIMP1                          | 32.1±32.8          | -57.9±20.8 *        | -62.5±2.0 ***       |
| IL-11                          | 27.0±6.9           | -37.0±26.7          | -72.4±4.8 ***       |
| IL-7                           | 6.5±2.7            | 20.6±41.9           | -13.9±1.4           |
| VCAM1                          | -2.0±9.1           | -48.3±22.3 **       | -51.5±2.8 ***       |
| GST-α                          | -                  | -27.0±30.1          | -47.2±15.7          |
| CD40                           | -                  | -52.0±21.4          | -84.8±2.9 ***       |
| MMP 9                          | -                  | -85.1±8.6 ***       | -82.2±0.3 ***       |
| Myoglobin                      | -                  | -                   | -                   |
| Apolipoprotein A-I             | -                  | -                   | -                   |
| SGOT                           | -                  | -                   | -                   |
